# Supplementary material for: Continuous amperometric detection of co-released serotonin and melatonin from the mucosa in the ileum
Source: Royal Society of Chemistry journal article supplement (doi:10.1039/b717034c), 2008-01-01

## SUPPLEMENTARY INFORMATION

**Figure A.** Fast scan cyclic voltammetry (FSCV) responses of melatonin and serotonin on a boron-doped diamond microelectrode (BDD). Experiments were carried out between the potential range of -0.6 to 1.5 V vs. Ag|AgCl reference electrode at 500 V s<sup>-1</sup> scan rate. A platinum wire served as the counter electrode. The mixture is shown in black, the serotonin in light grey and the melatonin response is shown in the dashed gray line.

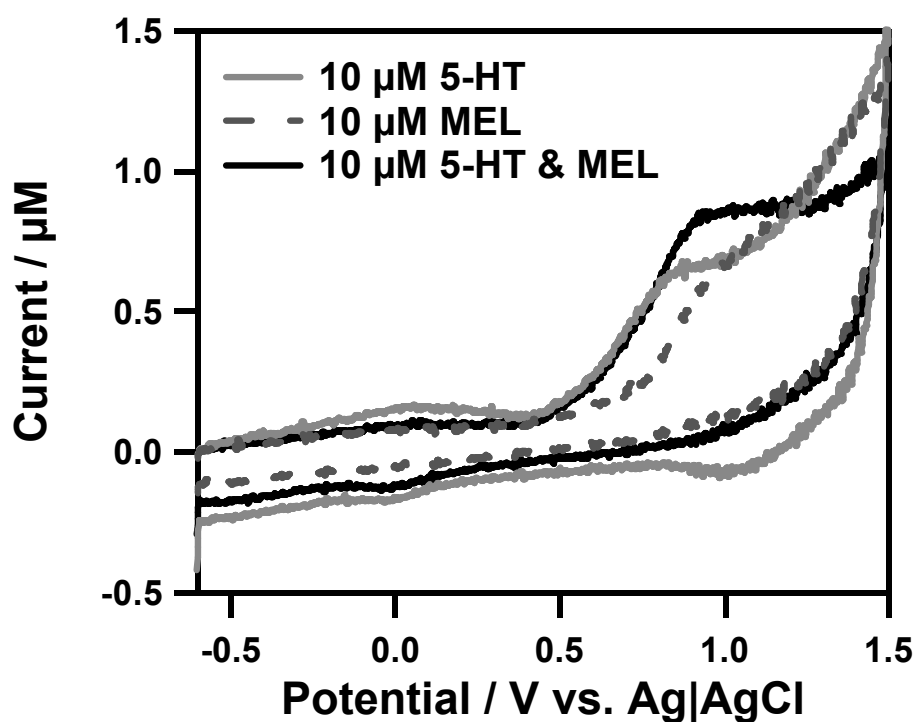

Supplement: b717034c.pdf [file b717034c.pdf]
